# Supplementary material
Source: PubMed Central journal article supplement (PMC7343818)

Fig. S1

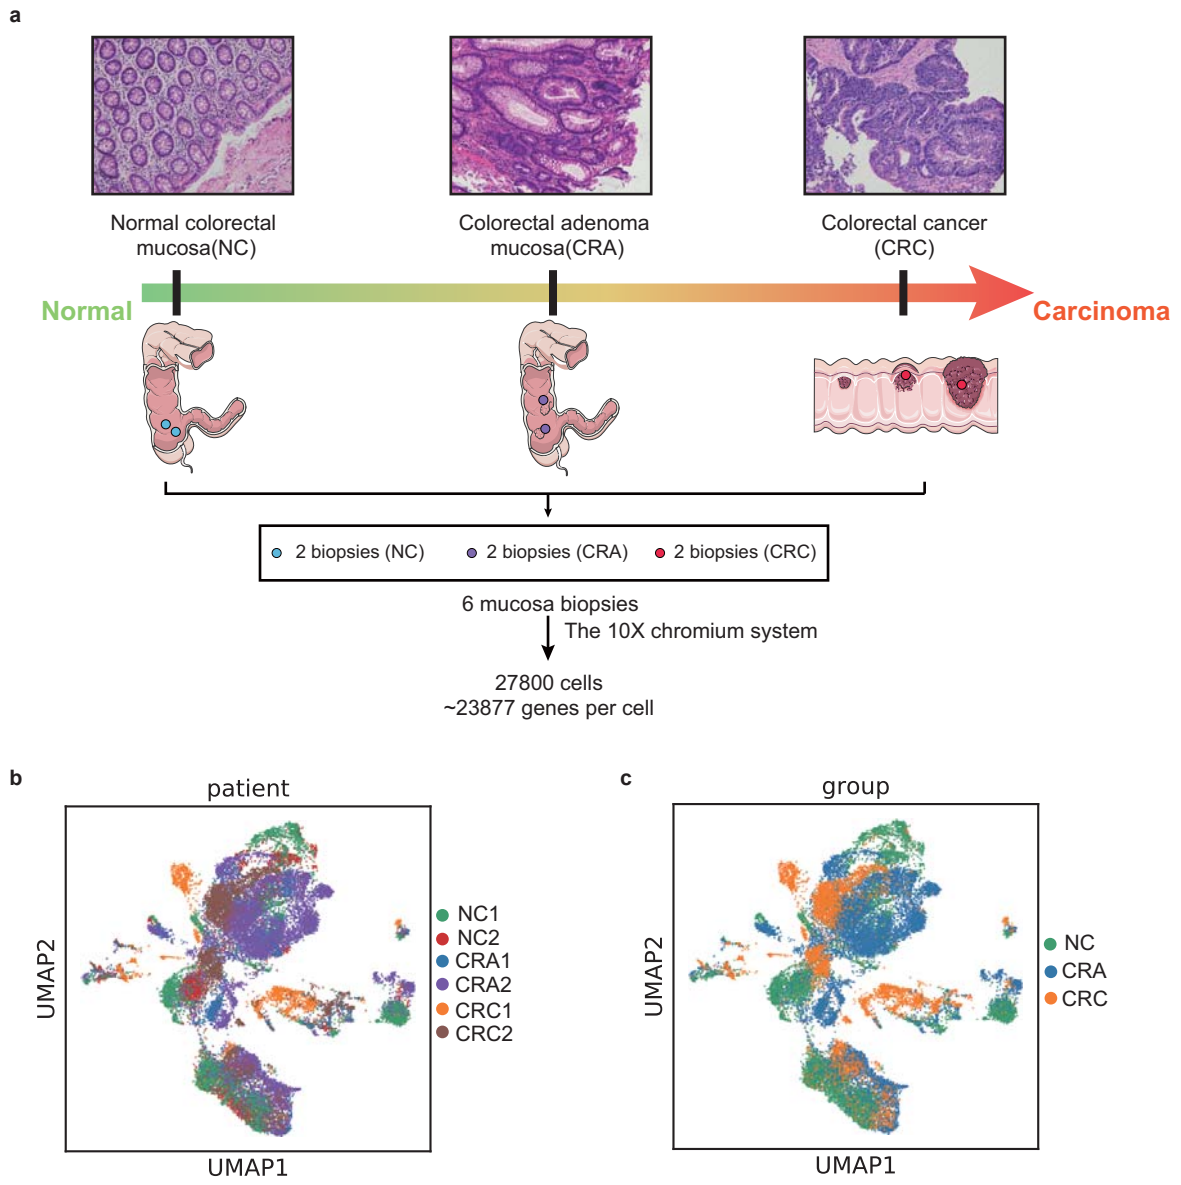

Fig. S2

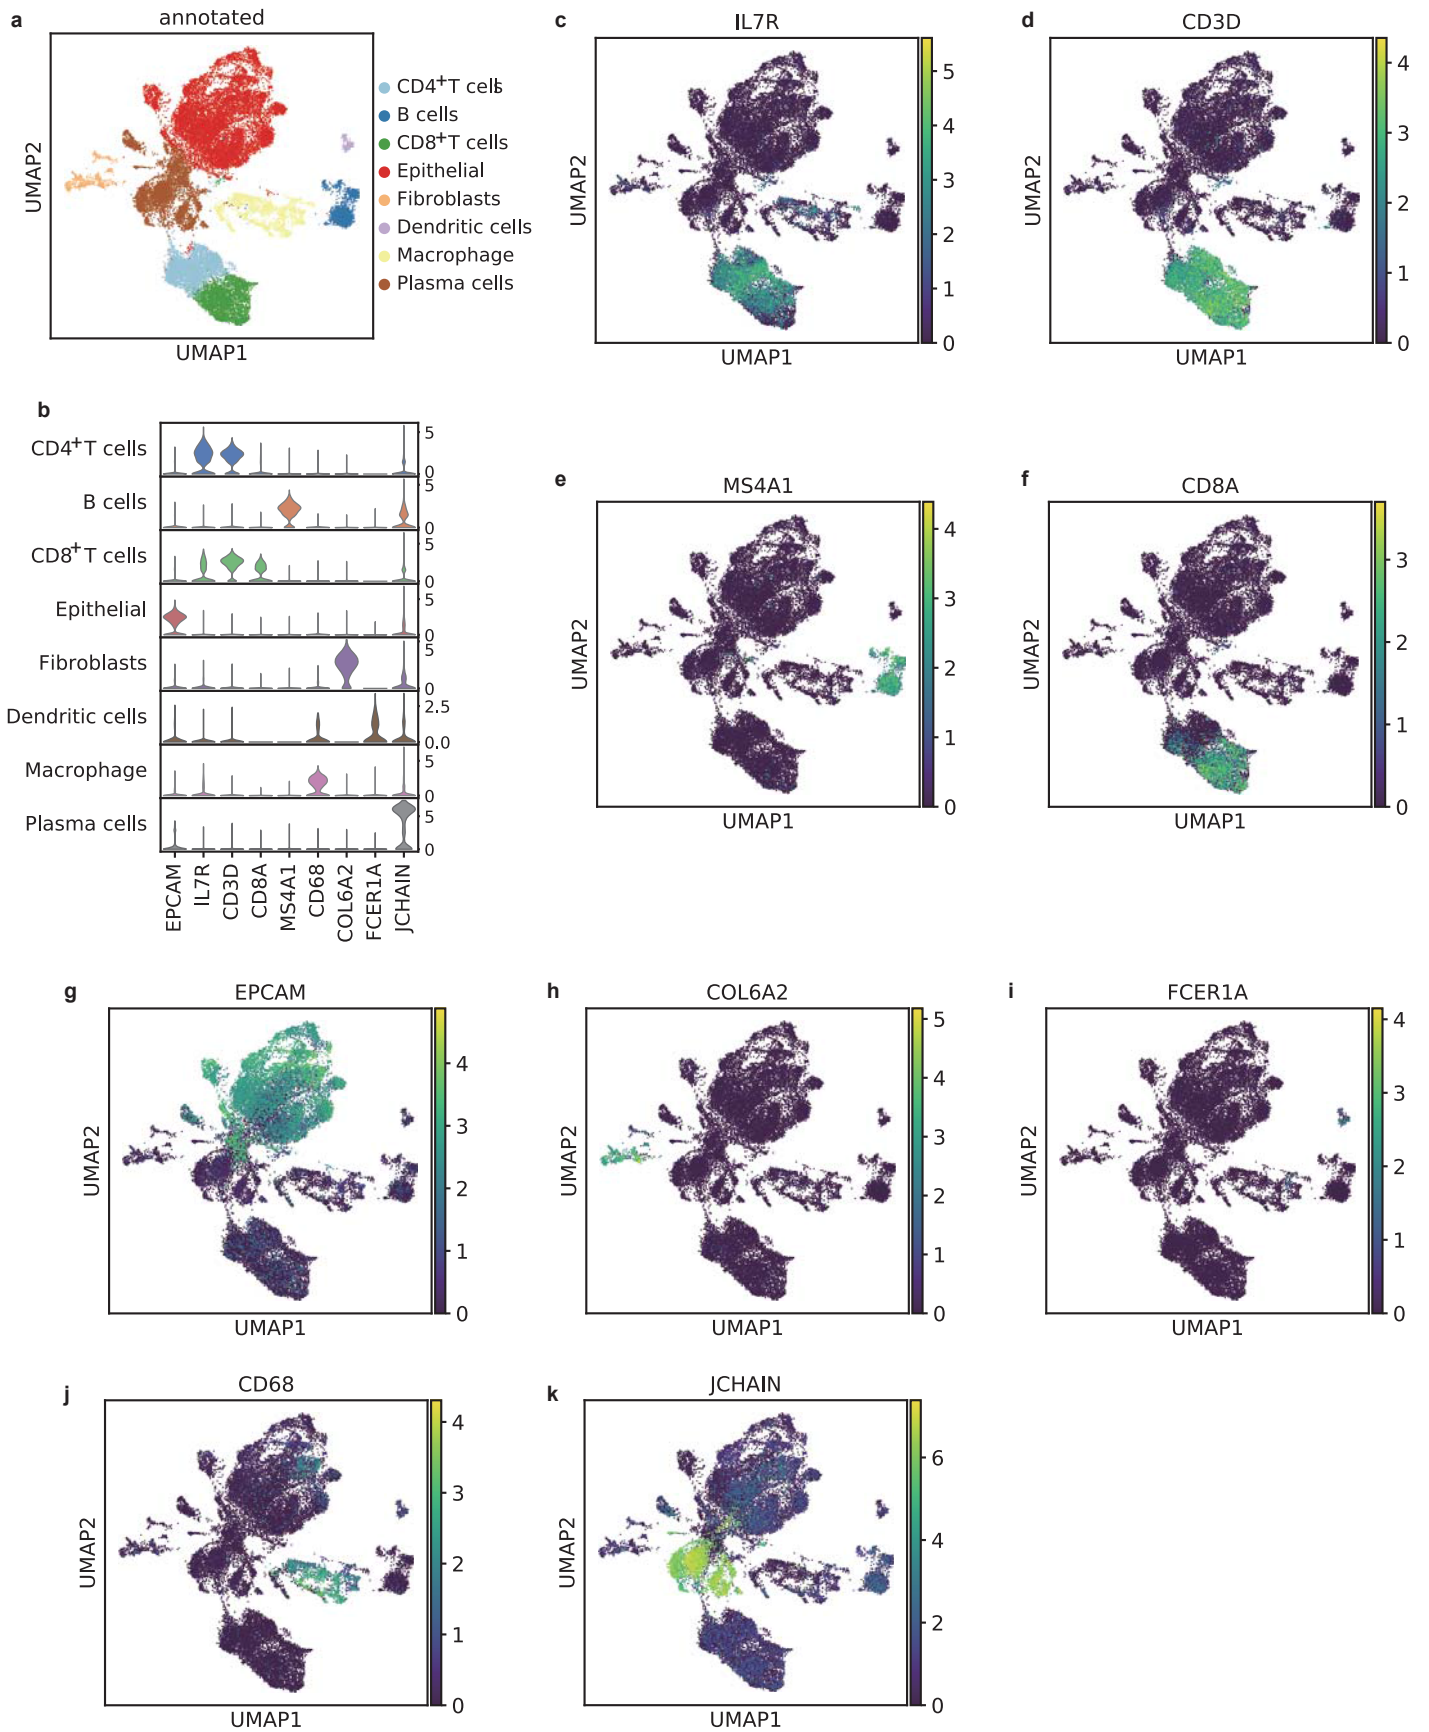

**Fig. S3**

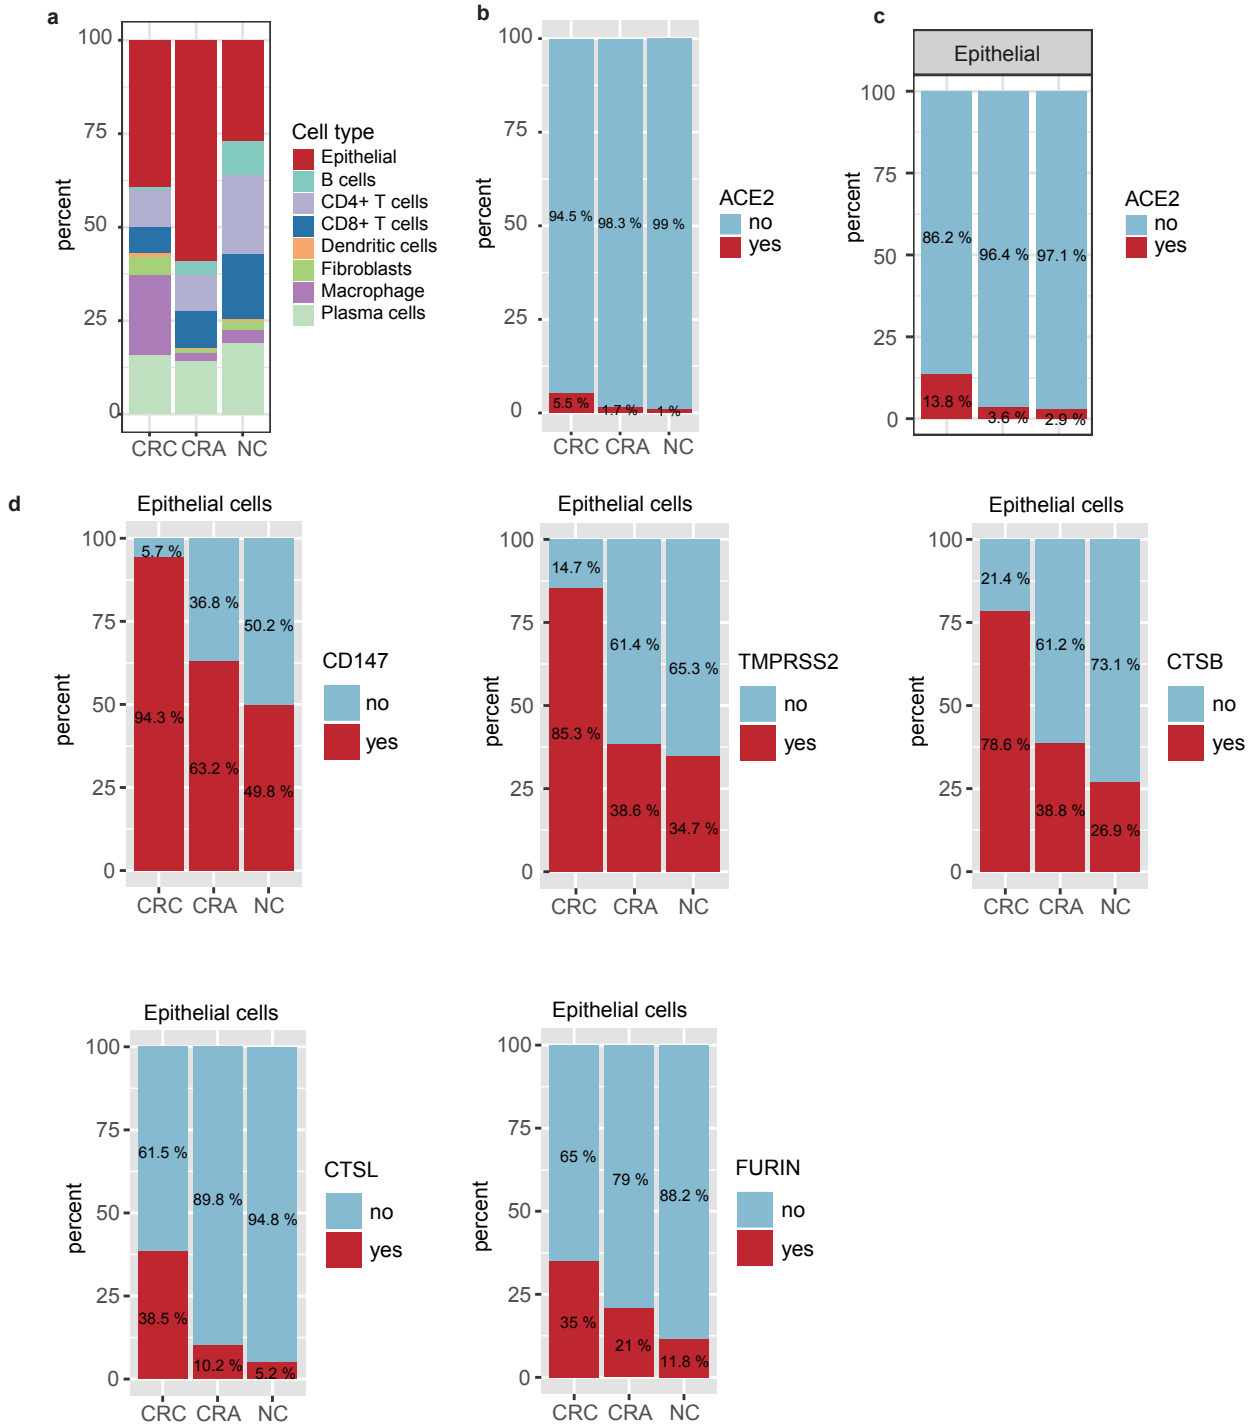

Fig. S4

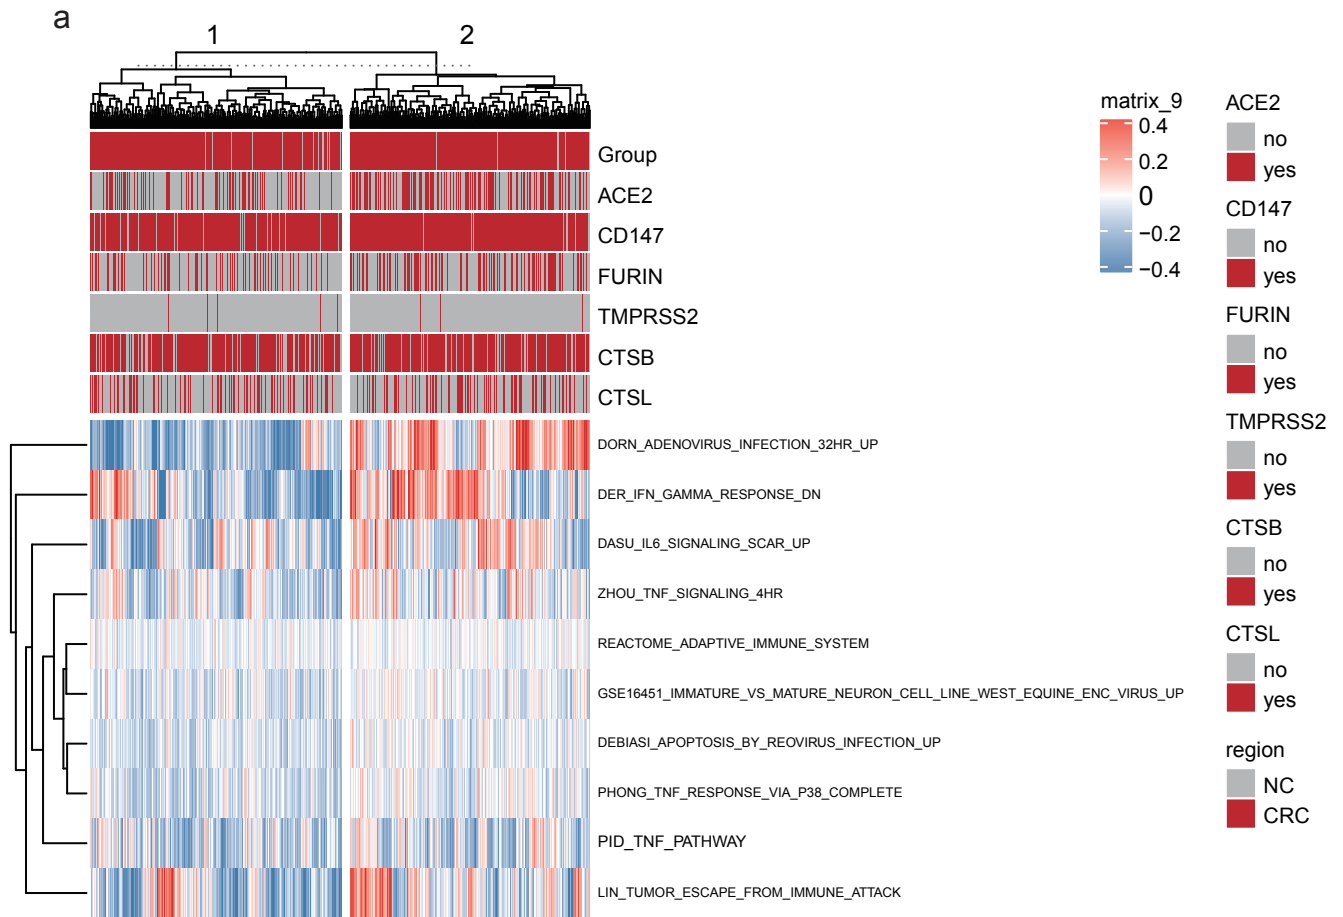

**b**

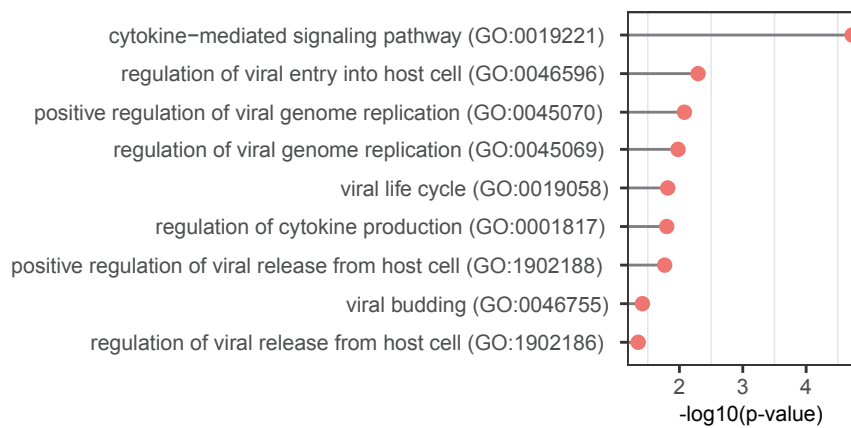

Supplement: 41392_2020_237_MOESM2_ESM.pdf [file 41392_2020_237_MOESM2_ESM.pdf]
